# Supplementary material for: Source apportionment in oil spill remediation
Source: Royal Society of Chemistry journal article supplement (doi:10.1039/c2em30156c), 2012-01-01
Supplement: c2em30156c.pdf [file c2em30156c.pdf]

## Supporting Information

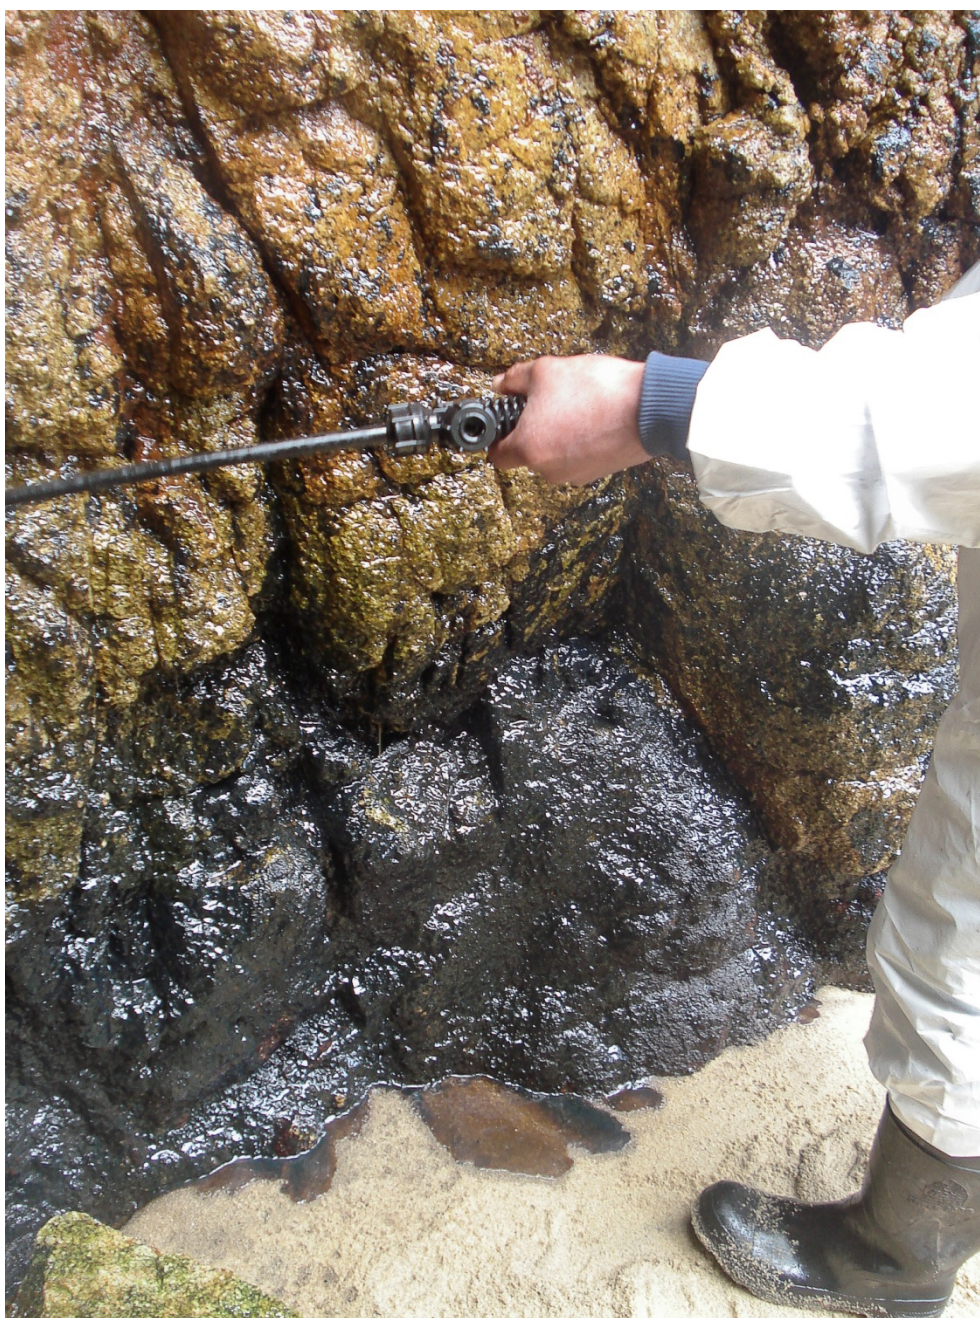

**Figure S1.** Cleaning oil off a rock face. The upper portion of the rock face has been cleaned with the biosolvent and the dissolved weathered oil can be seen flowing down the face into the sand.
